# Supplementary material for: Organisational change in hospitals: a qualitative case-study of staff perspectives
Source: PubMed Central journal article supplement (PMC6857127; doi:10.1186/s12913-019-4704-y), 2019-11-14
Supplement: 12913_2019_4704_MOESM1_ESM.pdf [file 12913_2019_4704_MOESM1_ESM.pdf]

## **Supplementary File A – Consolidated criteria for reporting qualitative studies (COREQ): 32-item checklist**

Tong A, Sainsbury P, Craig J. Consolidated criteria for reporting qualitative research (COREQ): a 32-item checklist for interviews and focus groups. *International Journal for Quality in Health Care*. 2007. Volume 19, Number 6: pp. 349 – 357

| No. Item                                           | Guide questions/description                                                                                                                              | Reported on Page # |
|----------------------------------------------------|----------------------------------------------------------------------------------------------------------------------------------------------------------|--------------------|
| <b>Domain 1: Research team and reflexivity</b>     |                                                                                                                                                          |                    |
| <b><i>Personal Characteristics</i></b>             |                                                                                                                                                          |                    |
| <b>1. Inter viewer/facilitator</b>                 | Which author/s conducted the interview or focus group?                                                                                                   | Page 8             |
| <b>2. Credentials</b>                              | What were the researcher’s credentials?<br>E.g. PhD, MD                                                                                                  | Page 1 and 8       |
| <b>3. Occupation</b>                               | What was their occupation at the time of the study?                                                                                                      | Page 1 and 8       |
| <b>4. Gender</b>                                   | Was the researcher male or female?                                                                                                                       | Page 1             |
| <b>5. Experience and training</b>                  | What experience or training did the researcher have?                                                                                                     | Page 1 and 8       |
| <b><i>Relationship with participants</i></b>       |                                                                                                                                                          |                    |
| <b>6. Relationship established</b>                 | Was a relationship established prior to study commencement?                                                                                              | Page 8             |
| <b>7. Participant knowledge of the interviewer</b> | What did the participants know about the researcher? e.g. personal goals, reasons for doing the research                                                 | Page 8             |
| <b>8. Interviewer characteristics</b>              | What characteristics were reported about the interviewer/facilitator? e.g. Bias, assumptions, reasons and interests in the research topic                | Page 8             |
| <b>Domain 2: study design</b>                      |                                                                                                                                                          |                    |
| <b><i>Theoretical framework</i></b>                |                                                                                                                                                          |                    |
| <b>9. Methodological orientation and Theory</b>    | What methodological orientation was stated to underpin the study? e.g. grounded theory, discourse analysis, ethnography, phenomenology, content analysis | Page 8             |
| <b><i>Participant selection</i></b>                |                                                                                                                                                          |                    |
| <b>10. Sampling</b>                                | How were participants selected? e.g. purposive, convenience, consecutive, snowball                                                                       | Page 7             |
| <b>11. Method of approach</b>                      | How were participants approached? e.g. face-to-face, telephone, mail, email                                                                              | Page 7 and 8       |
| <b>12. Sample size</b>                             | How many participants were in the study?                                                                                                                 | Page 9             |
| <b>13. Non-participation</b>                       | How many people refused to participate or dropped out? Reasons?                                                                                          | Page 7             |
| <b><i>Setting</i></b>                              |                                                                                                                                                          |                    |

|                                           |                                                                                                                                 |                                      |
|-------------------------------------------|---------------------------------------------------------------------------------------------------------------------------------|--------------------------------------|
| <b>14. Setting of data collection</b>     | Where was the data collected? e.g. home, clinic, workplace                                                                      | Page 7                               |
| <b>15. Presence of non-participants</b>   | Was anyone else present besides the participants and researchers?                                                               | Page 7-8                             |
| <b>16. Description of sample</b>          | What are the important characteristics of the sample? e.g. demographic data, date                                               | Page 6 and 7                         |
| <b>Data collection</b>                    |                                                                                                                                 |                                      |
| <b>17. Interview guide</b>                | Were questions, prompts, guides provided by the authors? Was it pilot tested?                                                   | Yes. Page 8 and Supplementary File B |
| <b>18. Repeat interviews</b>              | Were repeat interviews carried out? If yes, how many?                                                                           | No.                                  |
| <b>19. Audio/visual recording</b>         | Did the research use audio or visual recording to collect the data?                                                             | Yes. Page 8                          |
| <b>20. Field notes</b>                    | Were field notes made during and/or after the interview or focus group?                                                         | No. Page 8                           |
| <b>21. Duration</b>                       | What was the duration of the interviews or focus group?                                                                         | Page 9                               |
| <b>22. Data saturation</b>                | Was data saturation discussed?                                                                                                  | Yes. Page 7                          |
| <b>23. Transcripts returned</b>           | Were transcripts returned to participants for comment and/or correction?                                                        | No. Page 8                           |
| Domain 3: analysis and findings           |                                                                                                                                 |                                      |
| <b>Data analysis</b>                      |                                                                                                                                 |                                      |
| <b>24. Number of data coders</b>          | How many data coders coded the data?                                                                                            | Page 8                               |
| <b>25. Description of the coding tree</b> | Did authors provide a description of the coding tree?                                                                           | Page 9 and Figure 1                  |
| <b>26. Derivation of themes</b>           | Were themes identified in advance or derived from the data?                                                                     | Page 8                               |
| <b>27. Software</b>                       | What software, if applicable, was used to manage the data?                                                                      | Page 8                               |
| <b>28. Participant checking</b>           | Did participants provide feedback on the findings?                                                                              | No. Page 8.                          |
| <b>Reporting</b>                          |                                                                                                                                 |                                      |
| <b>29. Quotations presented</b>           | Were participant quotations presented to illustrate the themes/findings? Was each quotation identified? e.g. participant number | Yes. Page 10 - 15                    |
| <b>30. Data and findings consistent</b>   | Was there consistency between the data presented and the findings?                                                              | Yes. Page 10-15                      |
| <b>31. Clarity of major themes</b>        | Were major themes clearly presented in the findings?                                                                            | Yes. Page 10-15                      |
| <b>32. Clarity of minor themes</b>        | Is there a description of diverse cases or discussion of minor themes?                                                          | Yes. Page 10-15                      |
