# Supplementary material for: Organisational change in hospitals: a qualitative case-study of staff perspectives
Source: BMC Health Serv Res. 2019 Nov 14;19:840. doi: 10.1186/s12913-019-4704-y (PMC6857127; doi:10.1186/s12913-019-4704-y)
Supplement: Supplementary file 2 — Additional file 2. Semi-structured interview guide. [file 12913_2019_4704_MOESM2_ESM.pdf]

## **Supplementary File B – Semi-Structured Interview guide**

### **Introductory Questions:**

- ☐ Can you please tell me about your role at XXX Hospital?
- ☐ How long have you worked at XXX Hospital?

### **Enquiry into Hospital Expansion:**

- ☐ In your own words, what are the changes going on at XXX Hospital?
- ☐ Why do you think this change is happening?
- ☐ What do you think will come as a result of this large hospital change?
- ☐ Are you uncertain about any of these changes?

### **Personal Impact:**

- ☐ Do you think these changes will impact your role? (positive, negative, or unexpected)
  - a) Do you have any concerns about how the hospital redevelopment project will affect you?
  - b) What are you most looking forward to in regards to the changes?

### **Culture & Interprofessional Collaboration:**

- ☐ With the transition into the new building, do you think there will be a change in the way staff work together?
  - a) Hospital level
  - b) On the ward you work on
- ☐ Do you think there will be a change in culture?

### **Concluding Remarks:**

- ☐ Is there anything else you would like to add?

That is the end of the interview. Thank you for your time.
